# Supplementary material
Source: PubMed Central journal article supplement (PMC6324559)
Supplement: NIHMS947697-supplement-supplemental_material.pdf [file NIHMS947697-supplement-supplemental_material.pdf]

**Cell, Volume 172**

## **Supplemental Information**

### **Western Diet Triggers NLRP3-Dependent**

### **Innate Immune Reprogramming**

**Anette Christ, Patrick Günther, Mario A.R. Lauterbach, Peter Duewell, Debjani Biswas, Karin Pelka, Claus J. Scholz, Marije Oosting, Kristian Haendler, Kevin Baßler, Kathrin Klee, Jonas Schulte-Schrepping, Thomas Ulas, Simone J.C.F.M. Moorlag, Vinod Kumar, Min Hi Park, Leo A.B. Joosten, Laszlo A. Groh, Niels P. Riksen, Terje Espevik, Andreas Schlitzer, Yang Li, Michael L. Fitzgerald, Mihai G. Netea, Joachim L. Schultze, and Eicke Latz**

## Supplemental Tables

**Table 1. Serum cytokine levels.** Female *Ldlr<sup>-/-</sup>* mice were fed either chow diet (CD), western diet (WD) for 4 weeks or WD for 4 weeks followed by CD for 4 weeks (WD>CD) and serum cytokines were measured. pg/ml = picogram per milliliter

| Cytokine (pg/ml) | CD      | WD      | WD>CD   |
|------------------|---------|---------|---------|
| IL-1 $\alpha$    | 12.15   | 107.45  | 54.45   |
| IL-1 $\beta$     | 554.00  | 2288.98 | 472.31  |
| IL-2             | 41.22   | 247.23  | 39.90   |
| IL-3             | 13.36   | 102.23  | 13.62   |
| IL-4             | 7.47    | 42.08   | 7.95    |
| IL-5             | 60.22   | 156.47  | 30.42   |
| IL-6             | 22.81   | 62.56   | 16.20   |
| IL-9             | 318.81  | 802.64  | 302.35  |
| IL-10            | 87.03   | 385.39  | 78.13   |
| IL-12p40         | 264.02  | 211.49  | 253.39  |
| IL-12p70         | 157.05  | 627.88  | 185.46  |
| IL-13            | 368.36  | 1530.54 | 477.75  |
| IL-17            | 52.85   | 199.10  | 69.98   |
| G-CSF            | 159.48  | 272.95  | 130.05  |
| GM-CSF           | 212.68  | 561.09  | 211.18  |
| IFN $\gamma$     | 19.02   | 93.98   | 18.69   |
| CXCL1            | 163.69  | 140.47  | 87.91   |
| MCP-1            | 436.50  | 1222.79 | 338.51  |
| MIP-1 $\alpha$   | 18.58   | 37.06   | 17.17   |
| MIP-1 $\beta$    | 58.84   | 209.35  | 51.37   |
| CCL5             | 76.34   | 85.01   | 89.40   |
| TNF- $\alpha$    | 1965.22 | 3002.10 | 2207.60 |
| IL-18            | 1498.37 | 3184.53 | 1618.29 |
| VEGF             | 22.63   | 115.80  | 22.64   |
